# Supplementary material
Source: ML conference proceedings conference paper supplement (https://openaccess.thecvf.com/content/cvpr_2017/html/OToole_Reconstructing_Transient_Images_2017_CVPR_paper.html)
Supplement: Supplementary file 1 [file OToole_Reconstructing_Transient_Images_2017_CVPR_supplemental.zip.zip]

Archive with 4 entries (3 files):
- supplemental_document.pdf
- supplemental_video.mp4
- __MACOSX/
- __MACOSX/._supplemental_video.mp4
